# Supplementary material for: Long-term variations in trophic groups of coral reef fishes in the lagoon of Meiji Reef in the South China Sea
Source: Frontiers journal article supplement (doi:10.3389/fcosc.2023.1122719), 2023-03-31
Supplement: Data_Sheet_2.docx [file Data_Sheet_2.docx]

**Appendix S2. Absolute abundance and weight of different trophic fish in Meiji Reef lagoon between 1998–1999 and 2016–2018. The dt, hb, ip, iv, om, pi and pk mean detritivores, herbivores, piscivores, invertebrate feeders, omnivores, invertebrate feeder & piscivores, and planktivores, respectively.**

**
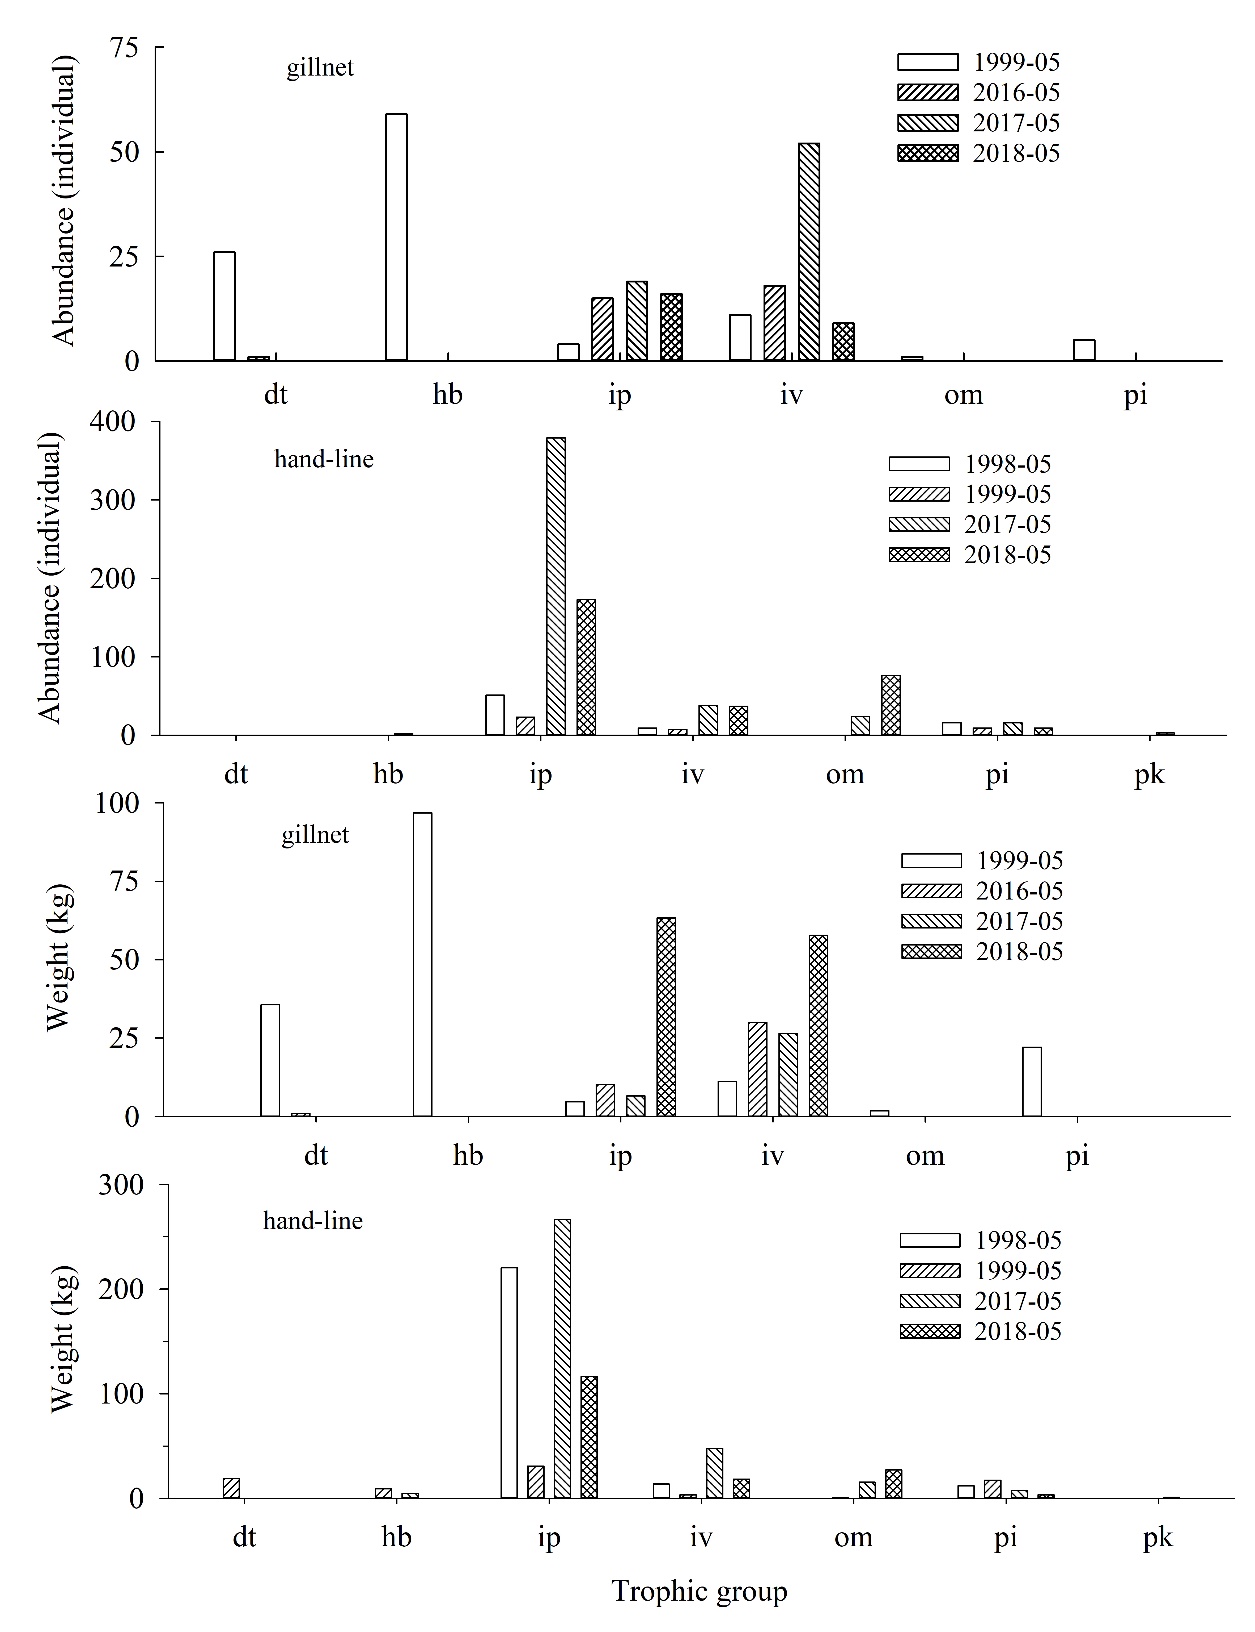
**
